# Supplementary material
Source: publisher figshare collection journal article supplement (https://future-science-group.figshare.com/articles/dataset/_/20227242)
Supplement: Supplementary file 1 [file 1]

Supplementary Table B

Baseline characteristics of metastatic CRC patients with liver metastases excluding patients with 90-day mortality of most definitive primary site surgery according to the treatment modality after propensity score matching.

| **Characteristics** | **All cases (N=998)** | **Surgery only (N=499) (50%)** | **Surgery and chemotherapy (N=499) (50%)** | **P value and test** |
| --- | --- | --- | --- | --- |
| **Mean age in years** | 53.09 ± 19.72 | 69.47 ± 13.34 | 36.70 ± 7.88 | <0.001 T-test |
| **Sex** |  |  |  | 0.087; Chi-square |
| Female | 521 (52.2%) | 274 (54.9%) | 247 (49.5%) |  |
| Male | 477 (47.8%) | 225 (45.1%) | 252 (50.5%) |  |
| **Race** |  |  |  | 0.107; Chi-square |
| White | 818 (82.0%) | 401 (80.4%) | 417 (83.6%) |  |
| African American | 114 (11.4%) | 68 (13.6%) | 46 (9.2%) |  |
| Others | 56 (5.6%) | 24 (4.8%) | 32 (6.4%) |  |
| Unknown | 10 (1.0%) | 6 (1.2%) | 4 (0.8%) |  |
| **Facility type** |  |  |  | <0.001; Chi-square |
| Community cancer program | 52(5.2%) | 42 (8.4%) | 10 (2.0%) |  |
| Comprehensive Community Cancer Program | 232 (23.2%) | 200 (40.1%) | 32 (6.4%) |  |
| Academic/Research Program | 240 (24.0%) | 171 (34.3%) | 69 (13.8%) |  |
| Integrated Network Cancer Program | 92 (9.2%) | 73 (14.6%) | 19 (3.8%) |  |
| Unknown | 382 (38.3%) | 13 (2.6%) | 369 (73.9%) |  |
| **Median household income 2012-2016** |  |  |  | <0.001; Chi-square |
| Less than $40,227 | 176 (17.6%) | 105 (21.0%) | 71 (14.2%) |  |
| $40,227 - $50,353 | 236 (23.6%) | 122 (24.4%) | 114 (22.8%) |  |
| $50,354- $63,332 | 209 (20.9%) | 119 (23.8%) | 90 (18.0%) |  |
| $63,333+ | 368 (36.9%) | 147 (29.5%) | 221 (44.3%) |  |
| Unknown | 9 (0.9%) | 9 (1.2%) | 3 (0.6%) |  |
| **Education level 2012-2016 (percentage of not graduated from high school)** |  |  |  | <0.001; Chi-square |
| 17.6% or more | 227 (22.7%) | 128 (25.7%) | 99 (19.8%) |  |
| 10.9% - 17.5% | 252 (25.3%) | 145 (29.1%) | 107 (21.4%) |  |
| 6.3%-10.8% | 257 (25.8%) | 117 (23.4%) | 140 (28.1%) |  |
| Less than 6.3% | 256 (25.7%) | 106 (21.2%) | 150 (30.1%) |  |
| Unknown | 6 (0.6%) | 3 (0.6%) | 3 (0.6%) |  |
| **Insurance status** |  |  |  | 0.813; Chi-square |
| No | 36 (3.6%) | 19 (3.8%) | 17 (3.2%) |  |
| Yes | 948 (95.0%) | 472 (94.6%) | 476 (95.4%) |  |
| Unknown | 14 (1.4%) | 8 (1.6%) | 6 (1.2%) |  |
| **Area** |  |  |  | 0.602; Chi-square |
| Metro counties | 835(83.7%) | 411 (82.4%) | 424 (85.0%) |  |
| Rural counties | 20 (2.0%) | 12 (2.4%) | 8 (1.6%) |  |
| Urban counties | 124 (12.4%) | 67 (13.4%) | 57 (11.4%) |  |
| Unknown | 19 (1.9%) | 9 (1.8%) | 10 (2.0%) |  |
| **Clinical T stage** |  |  |  | <0.001; Chi-square |
| T0 | 14 (1.4%) | 0 (0.0%) | 14 (2.8%) |  |
| T1 | 42 (4.2%) | 25 (5.0%) | 17 (3.4%) |  |
| T2 | 27 (2.7%) | 14 (2.8%) | 13 (2.6%) |  |
| T3 | 275 (27.6%) | 86 (17.2%) | 189 (37.9%) |  |
| T4 | 74 (7.4%) | 59 (11.8%) | 15 (3.0%) |  |
| Tis | 13 (1.3%) | 0 (0.0%) | 13 (2.6%) |  |
| Unknown | 553 (55.4%) | 315 (63.1%) | 238 (47.7%) |  |
| **Clinical N stage** |  |  |  | <0.001; Chi-square |
| N0 | 382 (38.3%) | 219 (43.9%) | 163 (32.7%) |  |
| N1 | 272 (27.3%) | 100 (20.0%) | 172 (34.5%) |  |
| N2 | 123 (12.3%) | 37 (7.4%) | 86 (17.2%) |  |
| Unknown | 221 (22.1%) | 143 (28.7%) | 78 (15.6%) |  |
| **Charlson-Deyo score** |  |  |  | <0.001; Chi-square |
| 0 | 799 (80.1%) | 328 (65.7%) | 471 (94.4%) |  |
| 1 | 146 (14.6%) | 122 (24.4%) | 24 (4.8%) |  |
| 2 | 39 (3.9%) | 38 (7.6%) | 1 (0.2%) |  |
| 3 | 14 (1.4%) | 11 (2.2%) | 3 (0.6%) |  |
